# Supplementary material
Source: ML conference proceedings conference paper supplement (https://openreview.net/forum?id=w90ZH5v34S)
Supplement: supplementary_material [file attachment]

Table 7: Examples of Generated Cartoon Descriptions

| Type of descriptions | GPT-4o                                                                                                                               | Human Written [20]                                                                              |
|----------------------|--------------------------------------------------------------------------------------------------------------------------------------|-------------------------------------------------------------------------------------------------|
| Canny description    | A knight in armor is riding a horse, holding a lance with a traffic light on top. A line of businessmen in suits follows behind him. | There are two men on a horse. They are wearing soldier outfits. Businessmen follow behind them. |
| Uncanny Description  | It’s unusual to see a medieval knight leading modern businessmen as if going into battle.                                            | There are businessmen following a two guys on horses who are soldiers.                          |
| Location             | an open field                                                                                                                        | a hilly path                                                                                    |
| Entities             | Knight, Horse, Businessmen, Traffic light                                                                                            | Warrior, Horses in warfare, Businessperson                                                      |

555 **A Links to Resources**

556 Our dataset is available at [https://huggingface.co/datasets/yguooo/newyorker\\_](https://huggingface.co/datasets/yguooo/newyorker_)  
 557 [caption\\_ranking](#) under Creative Commons Attribution Non Commercial 4.0. Our codebase is  
 558 available at <https://github.com/yguooo/cartoon-caption-generation> under Apache 2.0.

559 **B Language Model Prompts**

560 **B.1 Description Generation**

561 We use GPT-4o to generate descriptions for each cartoon. In the dataset from Hessel et al. [20] each  
 562 cartoon has a canny description, an uncanny description, a location, and a list of entity. Entity are  
 563 words that is related to the cartoon. We used the five shot method to generate a set of descriptions.  
 564 The five examples are randomly selected from the testing set, and we use the these same five example  
 565 for every cartoon descriptions generation. An example of our prompt is shown below.

**User:** In this task, you will see a cartoon, then write two descriptions about the cartoon, one uncanny description and one canny description, then write the cartoon’s location, and the entities of the cartoon. I am going to give you five examples first and you write the last sets of description.  
**User:** <Insert Cartoon Image>  
 566 **Assistant:** The canny description is <insert canny description> and the uncanny description is <insert uncanny description>, and the cartoon’s location is <insert location>, and the entities of the cartoon are <insert entities>  
*.....Repeat user/assistant for four more examples.....*  
**User:** <Insert Cartoon Image>. The set of description is

567 **B.2 Caption Evaluation**

568 We evaluate various models that generate captions by comparing the generated captions against four  
 569 groups of human contestant entries at different ranking levels, which include top10, #200-#209,  
 570 #1000-#1009, and contestant median. As concluded based on Table 2, we use GPT4-Turbo as  
 571 evaluator with descriptions from Hessel et al. [20] in Overall Comparison and GPT4o-vision as  
 572 evaluator with raw cartoon images in Best Pick Comparison. For both group comparison methods,  
 573 we utilize the 5-shot in-context prompting technique, as mentioned in Section 4.2.

574 An example of Overall Comparison is shown below.

**System:** You are a judge for the new yorker cartoon caption contest.  
**User:** In this task, you will see two description for a cartoon. Then, you will see two captions that were written about the cartoon. Then you will choose which captions is funnier. I am going to give you five examples first and you answer the last example with either A or B.  
**User:** For example, the descriptions for the images are <Insert Canny Description> and <Insert Uncanny Description>. The two captions are A: <Insert CaptionA> B: <Insert CaptionB>  
**Assistant:** The caption that is funnier is <Insert Answer>  
.....Repeat user/assistant for four more examples.....  
**User:** The descriptions for the images are <Insert Canny Description> and <Insert Uncanny Description>. The two groups of captions are group A: <Insert Caption Group A> group B: <Insert Caption Group B>  
**User:** Choose the group of captions that is funnier. Answer with only one letter A or B, and nothing else.

575

576 An example of Best Pick Comparison is shown below.

**System:** You are a judge for the new yorker cartoon caption contest. Your job is to find the funniest caption.  
**User:** In this task, you will see a cartoon first and two captions that were written about it then. The task is to choose which caption is funnier. I am going to show you five cartoons, corresponding captions and their answers first. In the end, for the last cartoon, answer with only one letter A or B, and nothing else.  
**User:** <Insert Cartoon Image>  
**Assistant:** <Insert Answer>  
.....Repeat user/assistant for four more examples.....  
**User:** <Insert Cartoon Image>  
**User:** Find the funniest caption for each group. Then choose the funnier group based on these funniest captions. Think step by step but finish the last line of your answer with only one letter A or B, and nothing else. A: <Insert Caption Group A> or B: <Insert Caption Group B>

577

### 578 B.3 Caption Generation

579 We used GPT-3.5-turbo, Claude-3-opus, and GPT-4-o to generate captions for each cartoons. We first  
580 use the system role to prompt it to generate 10 captions. Then we provide the image descriptions  
581 and then the image itself. For GPT-3.5-turbo, we simply only provided the image descriptions. For  
582 GPT-4-o, we have two versions where in one we provide the image itself, and the other we only  
583 provided the image descriptions. For Claude, we always provide both image description and image  
584 itself.

**System:** I want you to act as a sophisticated reader of The New Yorker Magazine. You are competing in The New Yorker Cartoon Caption Contest. Your task is to generate funny captions for a cartoon. Here are some ideas for developing funny captions. First think about characteristics associated with the objects and people featured in the cartoon. Then consider what are the unusual or absurd elements in the cartoon. It might help to imagine conversations between the characters. Then think about funny and non-obvious connections that can be made between the objects and characters. Try to come up with funny captions that fit the cartoon, but are not too direct. It may be funnier if the person reading the caption has to think a little bit to get the joke. Next, I will describe a cartoon image and then you should generate 10 funny captions for the cartoon along with an explanation for each.  
**User:** <Insert Cartoon Image>  
**User:** ”The cartoon’s description is: <insert canny description>.The uncanny description is: <insert uncanny description>. The location of the cartoon is:<insert location>. The entities of the cartoon are: <insert image entities>

585

## 586 **C Additional Experiment Setups**

### 587 **C.1 Human Experiment Details**

588 Each participant provided informed consent in compliance with our Institutional IRB and was  
589 compensated for their time. We paid participants \$12 an hour and spent about \$600 on data collection.  
590 The following instructions were used for the human experiments.

#### 591 **C.1.1 Human Pairwise with description generated by GPT4o-vision**

592 In each trial of this task, you will see a description of a cartoon and two captions: the cartoon  
593 description is on the top, and the two caption choices are beneath the cartoon description. For each  
594 trial, please select the caption that is the funniest for the cartoon.

#### 595 **C.1.2 Human Pairwise with Cartoon Image**

596 In each trial of this task, you will see one cartoon and two captions: the cartoon is on top, and the two  
597 caption choices are beneath the cartoon. For each trial, please select the caption that is the funniest  
598 for the cartoon.

#### 599 **C.1.3 Human Group (Overall) with description generated by GPT4o-vision**

600 In each trial of this task, you will see a description of a cartoon and two groups of captions: the  
601 cartoon description is on the top, and the two grouped caption choices are beneath the cartoon  
602 description. For each trial, please select the group of captions that is the funniest for the cartoon.

#### 603 **C.1.4 Human Group (Overall) with Cartoon Image**

604 In each trial of this task, you will see a cartoon and two groups of captions: the cartoon is on the top,  
605 and the two grouped caption choices are beneath the cartoon. For each trial, please select the group  
606 of captions that is the funniest for the cartoon.

#### 607 **C.1.5 Human Group (Best Pick) with description generated by GPT4o-vision**

608 In each trial of this task, you will see a description of a cartoon and two groups of captions: the  
609 cartoon description is on the top, and the two grouped caption choices are beneath the cartoon  
610 description. For each trial, please select the group of captions that contains the funniest caption  
611 for the cartoon. First, pick the funniest caption in each group, and then compare between the two  
612 captions to pick the funniest group.

#### 613 **C.1.6 Human Group (Best Pick) with Cartoon Image**

614 In each trial of this task, you will see a cartoon and two groups of captions: the cartoon is on the top,  
615 and the two grouped caption choices are beneath the cartoon. For each trial, please select the group  
616 of captions that contains the funniest caption for the cartoon. First, pick the funniest caption in each  
617 group, and then compare between the two captions to pick the funniest group.

#### 618 **C.1.7 Human top 10 vs Claude generated captions**

619 In each trial of this task, you will see a cartoon and two groups of captions: the cartoon is on the top,  
620 and the two grouped caption choices are beneath the cartoon. For each trial, please select the  
621 group of captions that is the funniest for the cartoon.

### 622 **C.2 Recalibration of GPT Models for Ranking**

623 For group comparisons without chain of thought, we observe a strong bias of GPT4 models choosing  
624 *A* over *B*. In other words, for some examples, the model always chooses option *A* even after we  
625 flip the two groups. Therefore, this suggests we need to calibrate the model predictions. We adopt

626 a simple approach by readjusting the decision threshold. Let  $s_i^A, s_i^B$  denote the log probabilities  
 627 of choosing  $A$  and  $B$  by the GPT4 model for two groups of human submitted captions  $x_i^A$  and  
 628  $x_i^B$  respectively. We use a small validation set of  $m$  examples  $\{x_i^A, x_i^B\}_{i=1}^m$  with sigmoid scores  
 629  $\{s_i^A, s_i^B\}_{i=1}^m$  and ground truth preference by the crowd denoted as  $\{y_i \in \{A, B\}\}_{i=1}^m$ . The current  
 630 decision rule takes the form of  $\hat{f}(x_i^A, x_i^B) = \begin{cases} A & \text{if } s_i^A - s_i^B > 0 \\ B & \text{otherwise} \end{cases}$ .

631 We simply set a different threshold  $\tau$ , which induces  $\hat{f}_\tau(x_i^A, x_i^B) = \begin{cases} A & \text{if } s_i^A - s_i^B > \tau \\ B & \text{otherwise} \end{cases}$ . The  
 632 threshold  $\tau^*$  is chosen so that the accuracy over the validation set is maximized:

$$\tau^* = \arg \max_{\tau} \sum_{i=1}^m \mathbf{1}\{y_i = \hat{f}_\tau(x_i^A, x_i^B)\}.$$

633 Ties are broken arbitrarily above. We then use the recalibrated decision rule with  $\tau^*$  for all of our  
 634 evaluations.

### 635 C.3 Finetuning Experiment Details

636 Our training and test split for finetuning range from contest 530 to 890. In particular, our dataset  
 637 includes all the data of [20] with ranking information within this range. ([20] only contains contests  
 638 up to #763.) Thus, we choose our test split to be the combination of testing (47 contests) and  
 639 validation split (44 contests) of [20] within the 530-890 range. The rest available contests form our  
 640 training split.

641 Our finetuning methods are trained from Mistral 7B Instruct v0.1 and LLaVa v1.6 Mistral (multimodal  
 642 case) via LoRA updates [21]. We use a variant of Mistral 7b model as our initial reward model to  
 643 finetune from [3]. The choice of reward is based on our benchmarking results of top reward models  
 644 on our caption generation dataset (Table [8]). For SFT methods, we train on 1000 pairs of captions  
 645 from each contest, with the preferred caption from the top 1000 captions and the alternative randomly  
 646 sampled from the rest. For reward modeling, DPO and RLHF, we train on 1000 pairs of captions  
 647 with three standard deviations apart according to Equation (1) per contest. Additionally, we train our  
 648 model using the default choice of optimizer from TRL up to 1 epoch. Then, we search for the best  
 649 hyper-parameter over the neighborhood of default parameters and pick the best performing model  
 650 under our GPT-based group comparison metrics. For our reward model, we pick the best model based  
 651 on the reward evaluation on the holdout set. For both pretrained and finetuned models, we use the  
 652 same generation configuration file with temperature 0.7, top-p sampling probability 0.95, repetition  
 653 penalty 1.15. When evaluating using the Best-of-N (BoN) method, we pick the top 10 captions based  
 654 on the trained reward model, out of 50 generated candidates from caption generation models. Our  
 655 choice of batch is 64 for SFT and reward model, and 128 for all other settings.

656 During the training process of DPO, PPO, SFT, we create a separate padding tokens and resize  
 657 the token embedding of the pretrained model so that the text generation can terminate properly.  
 658 Furthermore, in the loss design of SFT case, we only evaluate the next-token prediction loss on the  
 659 caption segment, as all the training texts contain similar prompts. Since we only reported the iteration  
 660 with the best results, early stopping occurs before a single epoch for the choice of best iterations.

661 **Choice of Prompts** In Table [10] we document the best prompt we found for each training algorithm.  
 662 Generally speaking, the zero-shot, SFT, preference learning algorithm each require simpler prompts  
 663 than the one preceding them.

664 **Computation Cost** Finetuning a SFT, DPO, PPO model usually takes 2-4 days to train till con-  
 665 vergence on a A100 machine. Evaluating a single number of each scenario cost roughly \$5 on the  
 666 openai platform.

<sup>3</sup>We use the pretrained reward model from <https://huggingface.co/weqweasd/RL-Mistral-7B>

667 **D Crowdsourced Caption Contest Ratings**

---

**Algorithm 1** Upper Confidence Bound (UCB) Algorithm

---

- 1: **Initialization:** For each caption  $x$ , initialize  $N_x(0) = 0$  and  $\hat{\mu}_x = 0$ .
- 2: **for**  $t = 1$  to  $T$  **do**
- 3:   Select caption  $x_t = \arg \max_x \left( \hat{\mu}_x + \sqrt{\frac{2 \ln(4N_x(t)^2)}{N_x(t)}} \right)$ .
- 4:   Observe the reward  $r_t \in \{1, 2, 3\}$  for caption  $x_t$ .
- 5:   Update the number of times action  $x_t$  has been selected:  $N_{x_t}(t) = N_{x_t}(t - 1) + 1$ .
- 6:   Update the empirical mean reward of action  $x_t$ :

$$\hat{\mu}_{x_t} = \frac{N_{x_t}(t - 1) \cdot \hat{\mu}_{x_t} + r_t}{N_{x_t}(t)}$$

- 7: **end for**
- 

668 As described in the text, we used a UCB [2] variant to encourage high-performing captions to  
 669 receive the votes. We experimented with standard UCB (see Algorithm 1) and KL-UCB specifically  
 670 optimized for discrete rewards [49]. The data repository labels datasets according to which algorithm  
 671 was employed for each contest. In practice, using UCB in high-traffic asynchronous environments  
 672 faces specific challenges. For example, we wanted to ensure that voters could only vote on one  
 673 caption at a time, that the model sent batches of captions to users to reduce round trips to the server,  
 674 and that the underlying model was able to update as frequently as possible. For more details on  
 675 overcoming such challenges, see [23].

676 **E Additional Results**

677 We benchmark the performance of different reward model as in Table 8 weqweasdas/RM-Mistral-7B  
 678 and Eurus-RM-7B Instruct are the top two models with the highest reward ranking accuracy. We  
 679 choose to use weqweasdas/RM-Mistral-7B because it generally achieves better ranking accuracy for  
 680 various data settings that we experimented on.

681 In our experiment, we noticed that PPO algorithm requires a much more aggressive early stopping  
 682 scheme than DPO and SFT. Thus, we further look at the training dynamics of the PPO algorithm  
 683 in Table 9. Here, the batch size is 128. It is worth noting that the result at iteration 0 has an lower  
 684 overall win rate than the zero shot result in Table 3. The reason is that our PPO and DPO algorithms  
 685 need to use a simpler prompt as in Table 10 to generate meaningful texts. From Table 9, we verified  
 686 the steady increase of the mean reward and decrease of the training loss. However, the improvement  
 687 on these metrics does not corresponds to an improvement of the overall humorous generation. We  
 688 hypothesize that this is due to the complex nature of humor and the potential for out-of-distribution  
 generations when running RLHF.

Table 8: Reward model benchmark

|                          | Reward Ranking Acc (%) |
|--------------------------|------------------------|
| Mistral-7B Instruct      | 73.17                  |
| Llama-3-8B Instruct      | 74.01                  |
| Llama-2-7B Chat          | 72.63                  |
| weqweasdas/RM-Mistral-7B | <b>74.05</b>           |
| Eurus-RM-7B              | <b>74.18</b>           |
| FsfairX-LLaMA3-RM-v0.1   | 73.72                  |
| Qwen1.5-7B-Chat          | 72.26                  |

689

Table 9: Training Dynamics of PPO

| Iteration                                              | 0      | 10           | 20     | 30     | 40     | 50            |
|--------------------------------------------------------|--------|--------------|--------|--------|--------|---------------|
| Contestant Median<br>(Overall Win Rate (%)) $\uparrow$ | 17.03  | <b>24.73</b> | 16.48  | 9.89   | 6.04   | 4.95          |
| Mean Reward $\uparrow$                                 | 0.0057 | 0.0260       | 0.0186 | 0.1309 | 0.1356 | <b>0.2587</b> |
| Loss $\downarrow$                                      | 0.3592 | 0.2001       | 0.1773 | 0.1709 | 0.0848 | <b>0.0584</b> |

Table 10: Best choice of prompts for each training algorithm

| Best Choice of Prompt |                                                                                                                                                                                                                                                                                                                                                                                                                                                                                                                                                                                                                                                                                                                                                                                                                                                                                                                                                                                                                                                                                                                                                                                                                                                                                                    |
|-----------------------|----------------------------------------------------------------------------------------------------------------------------------------------------------------------------------------------------------------------------------------------------------------------------------------------------------------------------------------------------------------------------------------------------------------------------------------------------------------------------------------------------------------------------------------------------------------------------------------------------------------------------------------------------------------------------------------------------------------------------------------------------------------------------------------------------------------------------------------------------------------------------------------------------------------------------------------------------------------------------------------------------------------------------------------------------------------------------------------------------------------------------------------------------------------------------------------------------------------------------------------------------------------------------------------------------|
| Zero-Shot             | <p>[INST] <math>\langle \rangle</math> I want you to act as a sophisticated reader of The New Yorker Magazine. You are competing in The New Yorker Cartoon Caption Contest. Your task is to generate funny captions for a cartoon. Here are some ideas for developing funny captions. First think about characteristics associated with the objects and people featured in the cartoon. Then consider what are the unusual or absurd elements in the cartoon. It might help to imagine conversations between the characters. Then think about funny and non-obvious connections that can be made between the objects and characters. Try to come up with funny captions that fit the cartoon, but are not too direct. It may be funnier if the person reading the caption has to think a little bit to get the joke. Next, I will describe a cartoon image and then you should generate 1 funny caption for the cartoon along with an explanation for each.</p> <p>scene: <math>\langle scene \rangle</math><br/> description: <math>\langle description \rangle</math><br/> uncanny description: <math>\langle uncanny description \rangle</math><br/> entities: <math>\langle entities \rangle \langle \rangle</math><br/> funny caption: [INST] <math>\langle sample caption \rangle</math></p> |
| SFT                   | <p>[INST] I want you to act as a sophisticated reader of The New Yorker Magazine. You are competing in The New Yorker Cartoon Caption Contest. Your task is to generate funny captions for a cartoon. Here are some ideas for developing funny captions. First think about characteristics associated with the objects and people featured in the cartoon. Then consider what are the unusual or absurd elements in the cartoon. It might help to imagine conversations between the characters. Then think about funny and non-obvious connections that can be made between the objects and characters. Try to come up with funny captions that fit the cartoon, but are not too direct. It may be funnier if the person reading the caption has to think a little bit to get the joke. Next, I will describe a cartoon image and then you should generate 1 funny caption for the cartoon [INST]</p> <p>scene: <math>\langle scene \rangle</math><br/> description: <math>\langle description \rangle</math><br/> uncanny description: <math>\langle uncanny description \rangle</math><br/> entities: <math>\langle entities \rangle</math><br/> funny caption: <math>\langle sample caption \rangle</math></p>                                                                                  |

| Best Choice of Prompt |                                                                                                                                                                                                                                                                                                                                                                                                                                                                                                                                                                                                                                                                                                                                                                                                                                                                                                                                                                                                                                                                                                                                                                                                                                                             |
|-----------------------|-------------------------------------------------------------------------------------------------------------------------------------------------------------------------------------------------------------------------------------------------------------------------------------------------------------------------------------------------------------------------------------------------------------------------------------------------------------------------------------------------------------------------------------------------------------------------------------------------------------------------------------------------------------------------------------------------------------------------------------------------------------------------------------------------------------------------------------------------------------------------------------------------------------------------------------------------------------------------------------------------------------------------------------------------------------------------------------------------------------------------------------------------------------------------------------------------------------------------------------------------------------|
| LLaVA                 | <p>[INST] I want you to act as a sophisticated reader of The New Yorker Magazine. You are competing in The New Yorker Cartoon Caption Contest. Your task is to generate funny captions for a cartoon. Here are some ideas for developing funny captions. First think about characteristics associated with the objects and people featured in the cartoon. Then consider what are the unusual or absurd elements in the cartoon. It might help to imagine conversations between the characters. Then think about funny and non-obvious connections that can be made between the objects and characters. Try to come up with funny captions that fit the cartoon, but are not too direct. It may be funnier if the person reading the caption has to think a little bit to get the joke. Next, I will provide a cartoon image with descriptions and then you should generate 1 funny caption for the cartoon along with an explanation for each.</p> <p>image: <i>&lt;image&gt;</i><br/> scene: <i>&lt;scene&gt;</i><br/> description: <i>&lt;description&gt;</i><br/> uncanny description: <i>&lt;uncanny description&gt;</i><br/> entities: <i>&lt;entities&gt;</i><br/> Generate a funny caption for the image: [/INST] <i>&lt;sample caption&gt;</i></p> |
| DPO/PPO/Reward Model  | <p>scene: <i>&lt;scene&gt;</i><br/> description: <i>&lt;description&gt;</i><br/> uncanny description: <i>&lt;uncanny description&gt;</i><br/> entities: <i>&lt;entities&gt;</i><br/> funny caption: <i>&lt;sample caption&gt;</i></p>                                                                                                                                                                                                                                                                                                                                                                                                                                                                                                                                                                                                                                                                                                                                                                                                                                                                                                                                                                                                                       |
